# Supplementary material for: Interfacial synthesis of polyaniline–polypyrrole on electrospun vanadium oxide-embedded TiO2 nanofibers with enhanced photocatalytic performance
Source: Royal Society of Chemistry journal article supplement (doi:10.1039/d2nj06284d), 2023-01-01
Supplement: d2nj06284d1.pdf [file d2nj06284d1.pdf]

### Supplementary Data

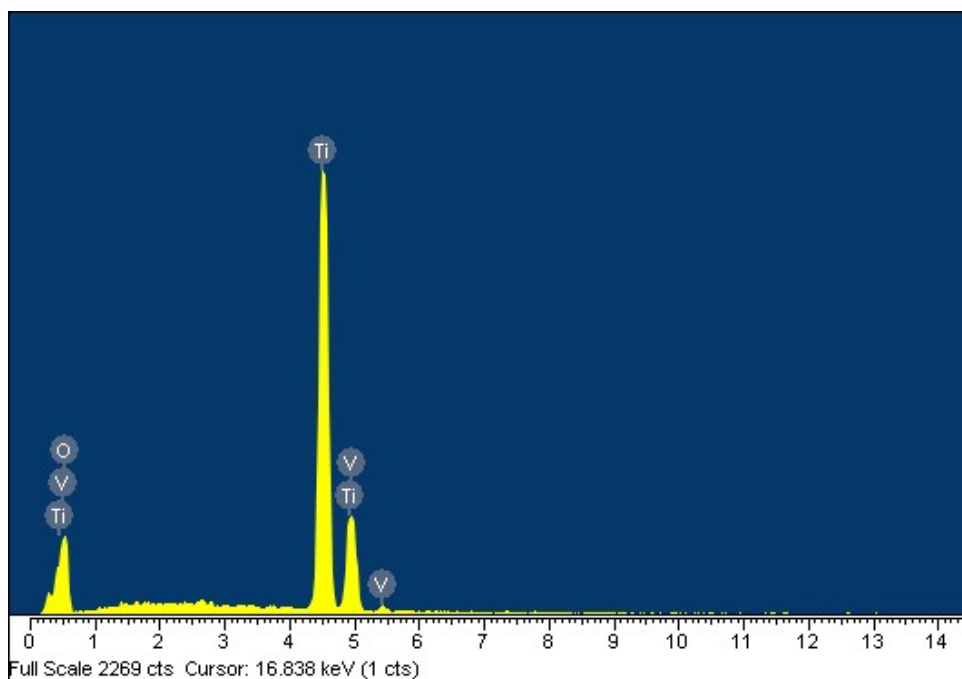

**Figure S0.** EDX spectrum of  $\text{TiO}_2\text{-VO}_x$

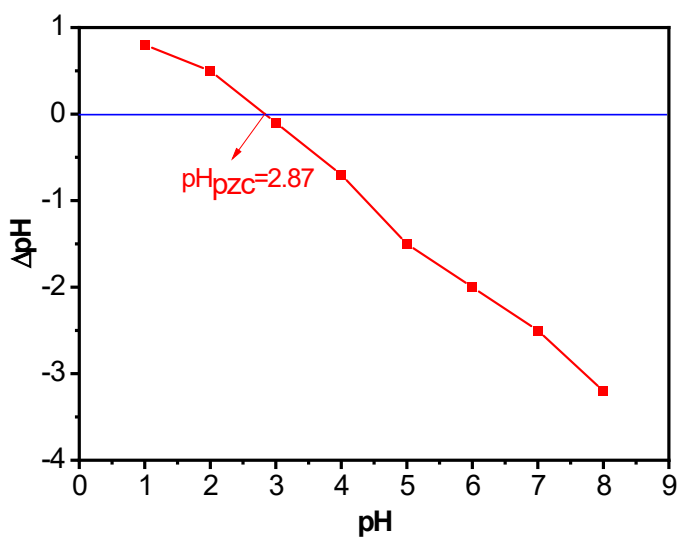

**Figure S1.** Isoelectric point ( $\text{pH}_{\text{pzc}}$ ) of  $\text{TiO}_2\text{-VO}_x/\text{PANi-PPy}$  composite

**Table S1.** Comparison of photocatalysts for PMS activation and RhB removal

| Photocatalyst | Synthesis | Conditions | Remark | Reference |
|---------------|-----------|------------|--------|-----------|
|---------------|-----------|------------|--------|-----------|

|                                                                   | method                                      |                                                                                                                    |                                                                                                                                |           |
|-------------------------------------------------------------------|---------------------------------------------|--------------------------------------------------------------------------------------------------------------------|--------------------------------------------------------------------------------------------------------------------------------|-----------|
| TiO <sub>2</sub> -V <sub>2</sub> O <sub>5</sub> /PANi-PPy         | Electrospinning, vapor-phase polymerization | Catalyst: 0.5 g/L; PMS: 0.65 mM; RhB: 20 mg/L; 25 °C; pH 7; Light: LED L4X 40W                                     | 97.03 % of RhB in 120 min<br>Key ROS: <sup>1</sup> O <sub>2</sub>                                                              | This work |
| CaFe <sub>2</sub> O <sub>4</sub>                                  | Sol-gel                                     | Catalyst: 1 g/L; PMS: 0.65 mM; RhB: 10 mg/L; pH 4.8; 25 °C; Light: xenon 500 W with a 420 nm cut-off filter        | 99.2 % of RhB in 120 min<br>Key ROS: h <sup>+</sup> and O <sub>2</sub> <sup>•</sup>                                            | [1]       |
| BiVO <sub>4</sub>                                                 | Hydrothermal                                | Catalyst: 0.5 g/L; PMS: 1.0 mM; RhB: 10 mg/L; pH 3; 25 °C; Light: metal halogen 400 W with a 415 nm cut-off filter | 90.9% of RhB removal in 60 min<br>Key ROS: SO <sub>4</sub> <sup>•-</sup> , HO <sup>•</sup> , and O <sub>2</sub> <sup>•</sup> . | [2]       |
| cPVC/Bi <sub>2</sub> O <sub>3</sub>                               | Solvothermal                                | Catalyst: 0.4 g/L; PMS: 0.3 g/L; RhB: 10 mg/L; pH 5.18; 23 °C; Light: Osram Ultra-Vitalux 300 W                    | 98% of RhB in 40 min<br>Key ROS: SO <sub>4</sub> <sup>•-</sup> and HO <sup>•</sup>                                             | [3]       |
| CoFe <sub>2</sub> O <sub>4</sub> @g-C <sub>3</sub> N <sub>4</sub> | Sol-gel, urea thermal polymerization        | Catalyst: 0.4 g/L; PMS: 0.09 g/L; RhB: 10 mg/L; pH: 9; Light source: Vonfram halogen 500 W                         | 96% of RhB in 30 min<br>Key ROS: SO <sub>4</sub> <sup>•-</sup> , HO <sup>•</sup> , and O <sub>2</sub> <sup>•</sup>             | [4]       |
| α-S                                                               | Wet chemical                                | Catalyst: 0.5 g/L; PMS: 0.4 g/L; RhB: 10 mg/L; pH 7; 40 °C; Light: 150 W Philips                                   | 100% of RhB in 50 min<br>Key ROS: SO <sub>4</sub> <sup>•-</sup> and HO <sup>•</sup>                                            | [5]       |
| BiFeO <sub>3</sub> microsphere                                    | Hydrothermal                                | Catalyst: 1 g/L; PMS: 5 mM; RhB: 5 mg/L; 25 °C; Light: xenon 500 W with a 420 nm cut-off filter                    | 63% of RhB in 40 min<br>Key ROS: HO <sup>•</sup> , SO <sub>4</sub> <sup>•-</sup> , and O <sub>2</sub> <sup>•</sup>             | [6]       |

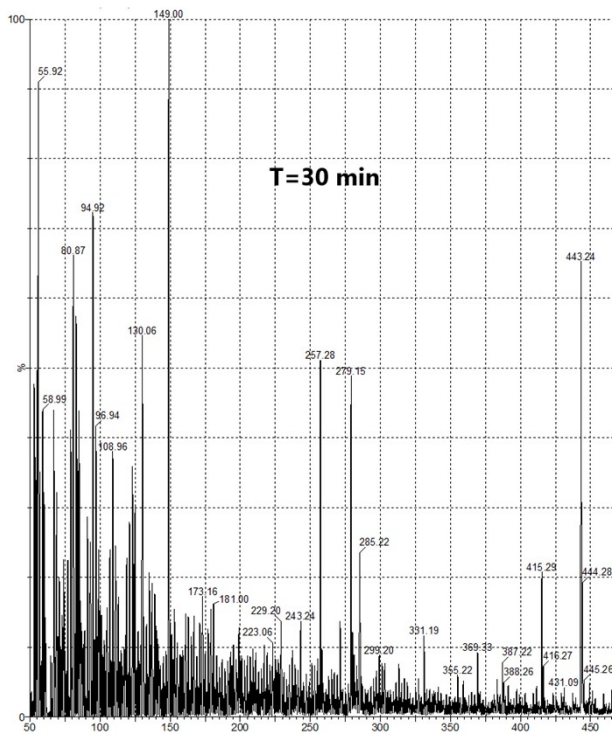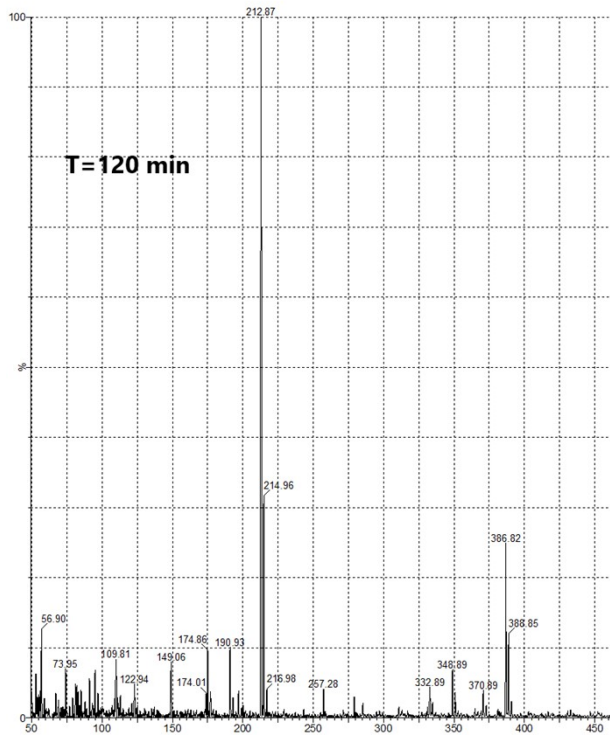

**Figure S2.** MS spectra of RhB solutions degraded by TiO<sub>2</sub>-VO<sub>x</sub>/PANi-PPy/PMS/Vis system.

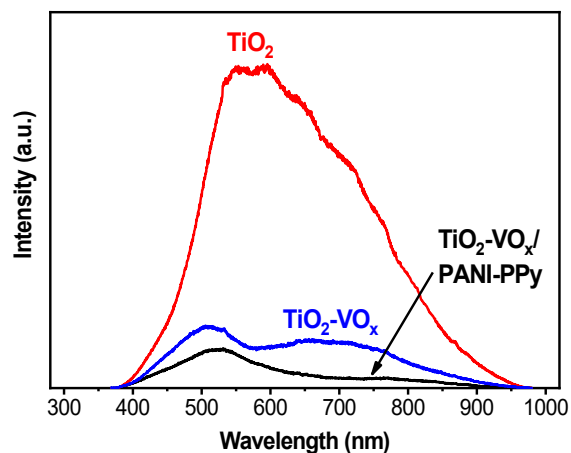

**Figure S3.** PL spectra of TiO<sub>2</sub> (red), TiO<sub>2</sub>-VO<sub>x</sub> (blue), and TiO<sub>2</sub>-VO<sub>x</sub>-PANi-PPy (black).

## References

- [1] S. Guo, Z. Yang, H. Zhang, W. Yang, J. Li, K. Zhou, Enhanced photocatalytic degradation of organic contaminants over CaFe<sub>2</sub>O<sub>4</sub> under visible LED light irradiation mediated by peroxymonosulfate, *Journal of Materials Science & Technology*, 62 (2021) 34-43.
- [2] Y. Liu, H. Guo, Y. Zhang, W. Tang, X. Cheng, H. Liu, Activation of peroxymonosulfate by BiVO<sub>4</sub> under visible light for degradation of Rhodamine B, *Chemical Physics Letters*, 653 (2016) 101-107.
- [3] H.-H. Pham, S.-J. You, Y.-F. Wang, M.T. Cao, V.-V. Pham, Activation of potassium peroxymonosulfate for rhodamine B photocatalytic degradation over visible-light-driven conjugated polyvinyl chloride/Bi<sub>2</sub>O<sub>3</sub> hybrid structure, *Sustainable Chemistry and Pharmacy*, 19 (2021).
- [4] X. Guo, S. Ai, D. Yang, L. Zhao, H. Ding, Synergistic photocatalytic and Fenton-like degradation of organic contaminants using peroxymonosulfate activated by CoFe<sub>2</sub>O<sub>4</sub>@g-C<sub>3</sub>N<sub>4</sub> composite, *Environ Technol*, 42 (2021) 2240-2253.
- [5] K.-Y. Andrew Lin, Z.-Y. Zhang,  $\alpha$ -Sulfur as a metal-free catalyst to activate peroxymonosulfate under visible light irradiation for decolorization, *RSC Advances*, 6 (2016) 15027-15034.
- [6] F. Chi, B. Song, B. Yang, Y. Lv, S. Ran, Q. Huo, Activation of peroxymonosulfate by BiFeO<sub>3</sub> microspheres under visible light irradiation for decomposition of organic pollutants, *RSC Advances*, 5 (2015) 67412-67417.
